# Supplementary material for: Coloration Modeling and Processing of Commodity Plastic Buttons in Supercritical Carbon Dioxide
Source: MDPI journal article supplement (doi:10.3390/ma16030907), 2023-01-17
Supplement: s1 [file s1]

Supplementary Data

# Coloration Modeling and Processing of Commodity Plastic Buttons in Supercritical Carbon Dioxide

**Table S1.** The experimental  $K/S$  values for acryl button at pressure, temperature, and treatment time, along with  $\text{CO}_2$  density and solubility of dye at every pressure and temperature.

| $K/S$ | $P/\text{MPa}$ | $T/^\circ\text{C}$ | $t/\text{min}$ | $\rho/\text{mol} \cdot \text{m}^{-3}$ | $y$      |
|-------|----------------|--------------------|----------------|---------------------------------------|----------|
| 27.47 | 8              | 40                 | 30             | 6314.4                                | 1.18E-07 |
| 36.51 | 8              | 40                 | 40             | 6314.4                                | 1.18E-07 |
| 23.72 | 8              | 40                 | 60             | 6314.4                                | 1.18E-07 |
| 18.83 | 8              | 50                 | 30             | 4980.3                                | 7.25E-08 |
| 32.65 | 10             | 40                 | 30             | 14283                                 | 6.90E-06 |
| 33.41 | 10             | 40                 | 40             | 14283                                 | 6.90E-06 |
| 39.88 | 10             | 40                 | 50             | 14283                                 | 6.90E-06 |
| 27.63 | 10             | 40                 | 60             | 14283                                 | 6.90E-06 |
| 34.81 | 10             | 45                 | 30             | 11321                                 | 2.90E-06 |
| 25.61 | 10             | 45                 | 40             | 11321                                 | 2.90E-06 |
| 22.74 | 10             | 45                 | 60             | 11321                                 | 2.90E-06 |
| 26.89 | 10             | 50                 | 30             | 8732.8                                | 1.10E-06 |
| 24.96 | 10             | 50                 | 60             | 8732.8                                | 1.10E-06 |
| 20.14 | 10             | 55                 | 30             | 7386.4                                | 6.61E-07 |
| 27.42 | 10             | 55                 | 40             | 7386.4                                | 6.61E-07 |
| 22.48 | 10             | 55                 | 60             | 7386.4                                | 6.61E-07 |
| 32.87 | 12             | 40                 | 30             | 16309                                 | 1.34E-05 |
| 29.07 | 12             | 40                 | 40             | 16309                                 | 1.34E-05 |
| 25.75 | 12             | 50                 | 30             | 13286                                 | 8.34E-06 |
| 29.56 | 14             | 40                 | 30             | 17343                                 | 1.82E-05 |
| 26.18 | 14             | 45                 | 30             | 16371                                 | 1.77E-05 |
| 46.03 | 14             | 50                 | 40             | 15273                                 | 1.64E-05 |

**Table S2.** The experimental  $K/S$  values for polyester button at pressure, temperature, and treatment time, along with  $\text{CO}_2$  density and solubility of dye at every pressure and temperature.

| $K/S$ | $P/\text{MPa}$ | $T/^\circ\text{C}$ | $t/\text{min}$ | $\rho/\text{mol} \cdot \text{m}^{-3}$ | $y$      |
|-------|----------------|--------------------|----------------|---------------------------------------|----------|
| 27.47 | 10             | 115                | 30             | 3906.8                                | 1.03E-06 |
| 28.36 | 10             | 115                | 60             | 3906.8                                | 1.03E-06 |
| 29.31 | 10             | 120                | 20             | 3801.6                                | 1.18E-06 |
| 25.89 | 10             | 120                | 30             | 3801.6                                | 1.18E-06 |
| 30.45 | 10             | 120                | 40             | 3801.6                                | 1.18E-06 |
| 27.58 | 10             | 120                | 60             | 3801.6                                | 1.18E-06 |
| 30.19 | 10             | 125                | 60             | 3704.4                                | 1.35E-06 |
| 30.32 | 12             | 115                | 40             | 4931.6                                | 2.66E-06 |
| 33.1  | 12             | 120                | 30             | 4778.6                                | 2.96E-06 |
| 39.44 | 12             | 120                | 60             | 4778.6                                | 2.96E-06 |
| 26.63 | 12             | 125                | 20             | 4639.2                                | 3.30E-06 |
| 40.56 | 12             | 125                | 30             | 4639.2                                | 3.30E-06 |
| 41.74 | 14             | 110                | 30             | 6274.1                                | 5.65E-06 |
| 34.89 | 14             | 110                | 40             | 6274.1                                | 5.65E-06 |
| 39.44 | 14             | 110                | 60             | 6274.1                                | 5.65E-06 |
| 42.48 | 14             | 115                | 30             | 6037.6                                | 6.06E-06 |
| 31.2  | 14             | 115                | 60             | 6037.6                                | 6.06E-06 |
| 33.18 | 14             | 120                | 20             | 5826.2                                | 6.55E-06 |

|       |    |     |    |        |          |
|-------|----|-----|----|--------|----------|
| 31.34 | 14 | 120 | 30 | 5826.2 | 6.55E-06 |
| 35.77 | 14 | 120 | 40 | 5826.2 | 6.55E-06 |
| 42.48 | 14 | 120 | 60 | 5826.2 | 6.55E-06 |
| 42.11 | 14 | 125 | 20 | 5635.5 | 7.13E-06 |
| 36.41 | 14 | 125 | 30 | 5635.5 | 7.13E-06 |
| 42.99 | 14 | 125 | 40 | 5635.5 | 7.13E-06 |
| 45.3  | 14 | 125 | 60 | 5635.5 | 7.13E-06 |
| 34.22 | 16 | 110 | 40 | 7509.1 | 1.18E-05 |
| 36.6  | 16 | 120 | 30 | 6923   | 1.31E-05 |
| 44.32 | 16 | 120 | 40 | 6923   | 1.31E-05 |
| 35.24 | 16 | 120 | 60 | 6923   | 1.31E-05 |

**Table S3.** The experimental K/S values for casein button at pressure, temperature, and treatment time, along with CO<sub>2</sub> density and solubility of dye at every pressure and temperature.

| <i>K/S</i> | <i>P/MPa</i> | <i>T/°C</i> | <i>t/min</i> | $\rho/\text{mol} \cdot \text{m}^{-3}$ | <i>y</i> |
|------------|--------------|-------------|--------------|---------------------------------------|----------|
| 31.13      | 8            | 80          | 30           | 3643.2                                | 1.15E-07 |
| 28.42      | 8            | 80          | 60           | 3643.2                                | 1.15E-07 |
| 28.83      | 8            | 100         | 60           | 3210.1                                | 2.10E-07 |
| 28.89      | 8            | 110         | 40           | 3045                                  | 2.90E-07 |
| 33.38      | 10           | 80          | 20           | 5035.3                                | 4.83E-07 |
| 34.55      | 10           | 80          | 30           | 5035.3                                | 4.83E-07 |
| 28.83      | 10           | 80          | 40           | 5035.3                                | 4.83E-07 |
| 32.37      | 10           | 80          | 60           | 5035.3                                | 4.83E-07 |
| 32.19      | 10           | 90          | 30           | 4611.1                                | 5.71E-07 |
| 32.53      | 10           | 90          | 40           | 4611.1                                | 5.71E-07 |
| 27.15      | 10           | 100         | 30           | 4284.6                                | 7.10E-07 |
| 33.89      | 10           | 100         | 60           | 4284.6                                | 7.10E-07 |
| 38.17      | 10           | 110         | 60           | 4021.2                                | 9.08E-07 |
| 35.37      | 12           | 80          | 40           | 6742.5                                | 1.77E-06 |
| 31.62      | 12           | 80          | 60           | 6742.5                                | 1.77E-06 |
| 30.19      | 12           | 90          | 60           | 6020.2                                | 1.81E-06 |
| 30.99      | 12           | 100         | 20           | 5500.4                                | 2.03E-06 |
| 34.14      | 12           | 100         | 30           | 5500.4                                | 2.03E-06 |
| 43.65      | 14           | 80          | 20           | 8711.2                                | 5.52E-06 |
| 39.44      | 14           | 80          | 40           | 8711.2                                | 5.52E-06 |
| 40.53      | 14           | 80          | 60           | 8711.2                                | 5.52E-06 |
| 32.12      | 14           | 90          | 30           | 7613.7                                | 4.99E-06 |
| 33.18      | 14           | 100         | 40           | 6846.2                                | 5.12E-06 |
| 34.64      | 14           | 110         | 20           | 6274.1                                | 5.65E-06 |

**Table S4.** The experimental K/S values for nylon button at pressure, temperature, and treatment time, along with CO<sub>2</sub> density and solubility of dye at every pressure and temperature.

| <i>K/S</i> | <i>P/MPa</i> | <i>T/°C</i> | <i>t/min</i> | $\rho/\text{mol} \cdot \text{m}^{-3}$ | <i>y</i> |
|------------|--------------|-------------|--------------|---------------------------------------|----------|
| 12.15      | 21           | 120         | 30           | 9632.9                                | 4.92E-05 |
| 12.83      | 21           | 120         | 40           | 9632.9                                | 4.92E-05 |
| 13.08      | 21           | 120         | 60           | 9632.9                                | 4.92E-05 |
| 11.43      | 25           | 110         | 60           | 12376                                 | 9.22E-05 |
| 13.43      | 25           | 120         | 30           | 11487                                 | 9.96E-05 |
| 13.81      | 25           | 120         | 40           | 11487                                 | 9.96E-05 |
| 13.91      | 25           | 120         | 60           | 11487                                 | 9.96E-05 |
| 13.74      | 25           | 120         | 80           | 11487                                 | 9.96E-05 |
| 13.34      | 25           | 125         | 100          | 11084                                 | 1.04E-04 |
| 10.89      | 27           | 110         | 30           | 13152                                 | 1.18E-04 |
| 9.93       | 27           | 110         | 40           | 13152                                 | 1.18E-04 |
| 12.26      | 27           | 110         | 60           | 13152                                 | 1.18E-04 |
| 14.17      | 27           | 110         | 80           | 13152                                 | 1.18E-04 |
| 14.32      | 27           | 120         | 30           | 12275                                 | 1.30E-04 |

---

|       |    |     |     |       |          |
|-------|----|-----|-----|-------|----------|
| 13.48 | 27 | 120 | 40  | 12275 | 1.30E-04 |
| 14.21 | 27 | 120 | 60  | 12275 | 1.30E-04 |
| 12.53 | 27 | 120 | 80  | 12275 | 1.30E-04 |
| 14.05 | 27 | 120 | 100 | 12275 | 1.30E-04 |
| 15.18 | 27 | 125 | 30  | 11870 | 1.36E-04 |
| 13.12 | 27 | 125 | 40  | 11870 | 1.36E-04 |
| 13.67 | 27 | 125 | 60  | 11870 | 1.36E-04 |
| 12.46 | 27 | 130 | 30  | 11487 | 1.43E-04 |
| 12.59 | 27 | 130 | 40  | 11487 | 1.43E-04 |
| 12.92 | 27 | 130 | 60  | 11487 | 1.43E-04 |
| 11.79 | 29 | 110 | 100 | 13831 | 1.46E-04 |
| 13.42 | 29 | 120 | 60  | 12976 | 1.62E-04 |
| 15.06 | 29 | 125 | 80  | 12576 | 1.72E-04 |

---
